# Supplementary material
Source: MDPI journal article supplement (https://www.mdpi.com/2071-1050/13/23/13499)
Supplement: s1 [file s1]

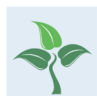

**Table S1.** Scenario for the in-depth interviews with 20 selected anglers performed in the region of Bohemia from January to August 2021. The topics for the interviews were reporting of fish harvested and sustainable recreational angling.

| Questions                                                                         |
|-----------------------------------------------------------------------------------|
| Why do you fish? What motivates you to fish?                                      |
| Do you report all fish harvested and all fishing trips? If not, why not?          |
| Do you consider reporting of fish harvested and fishing trips necessary? And why? |
| Does reporting of fish harvested and fishing trips make sense to you?             |
| What do you find bothering about reporting of fish harvested and fishing visits?  |
| How would you change the system of reporting? What works well for you?            |
| What do you think when the term "sustainable fishing" is mentioned?               |
| How could be local fisheries be more sustainable?                                 |

**Table S2.** Scenario for the in-depth interviews with 20 selected fishery managers performed in the region of Bohemia from January to August 2021. The topics for the interviews were reporting of fish harvested and sustainable recreational angling.

| Questions                                                                  |
|----------------------------------------------------------------------------|
| What management of your fishery do you perform?                            |
| What is sustainable fisheries management to you?                           |
| What could be improved to make the fishery management more sustainable?    |
| What kind of fishery management do anglers accept and what do they refuse? |
| What could be improved on the angling reporting system?                    |
| Why do anglers not report fish harvested and angling visits?               |
| How do you motivate anglers to report fish harvested and fishing trips?    |
